# Supplementary material for: A Poultry Litter-Derived Organomineral Phosphate Fertilizer Has Higher Agronomic Effectiveness Than Conventional Phosphate Fertilizer Applied to Field-Grown Maize and Soybean
Source: MDPI journal article supplement (doi:10.3390/su132111635), 2021-10-21
Supplement: s1 [file s1]

Archive with 1 entries (1 files):
- sustainability-1361713-supplementary.pdf
